# Supplementary material for: A rapid and sensitive aptamer-based biosensor for beta-lactoglobulin in milk
Source: Royal Society of Chemistry journal article supplement (doi:10.1039/d4ay00460d), 2024-01-01
Supplement: d4ay00460d1.pdf [file d4ay00460d1.pdf]

## Supplementary Information

A Rapid and Sensitive Aptamer-Based Biosensor for Beta-lactoglobulin milk

Anqi Liu<sup>a</sup>, Meng Jiang<sup>b</sup>, Yuyin Wu<sup>c</sup>, Han Guo<sup>b</sup>, Ling Kong<sup>a</sup>, Zhiwei Chen<sup>a,c,d\*</sup>,  
Zhaofeng Luo<sup>b\*</sup>

- a. *School of Life Sciences and Medicine, Shandong University of Technology, Zibo, 255049, China*
- b. *The Key Laboratory of Zhejiang Province for Aptamers and Theranostics, Hangzhou Institute of Medicine Chinese Academy of Sciences, 310022, China*
- c. *School of Agriculture Engineering and Food Science, Shandong University of Technology, Zibo, 255049, P.R. China.*
- d. *Institute of Food and Nutrition Science, Shandong University of Technology, Zibo, 255049, P.R. China*

*\*Corresponding author e-mails:*

*biometrysdut@163.com*

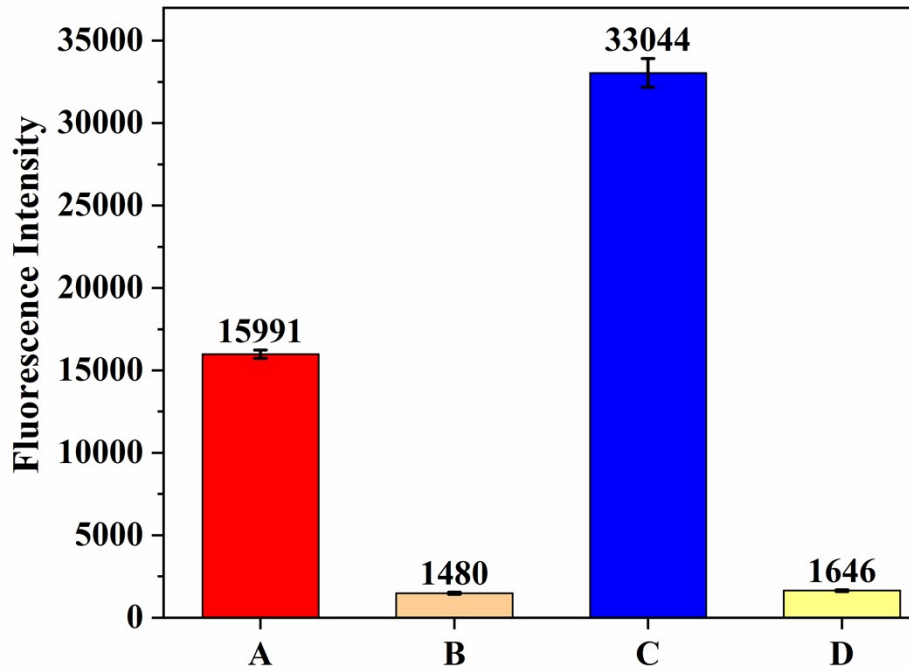

Figure S1 The luminescence values of the four experimental groups for coupling efficiency calculation.

Table S1. Sequences of the library and primers

| Name          | Library and Primers (5' to 3')                               |
|---------------|--------------------------------------------------------------|
| library10     | ATTGGCACTCCACGCATAGG-(N <sub>36</sub> )-CCTATGCGTGCTACCGTGAA |
| L10-S1        | ATTGGCACTCCACGCATAGG                                         |
| L10-A2        | TTCACGGTAGCACGCATAGG                                         |
| L10-FAM-S1    | FAM-ATTGGCACTCCACGCATAGG                                     |
| L10-Biotin-A2 | Biotin-TTCACGGTAGCACGCATAGG                                  |
| L10-polyA-A2  | AAAAAAAAAAAAAAAAAAAAA-spacer18-TTCACGGTAGCACGCATAGG          |

Table S2. The conditions of SELEX process

| $\beta$ -Lg (lib10) | Library input concentration (pM) | HsDNA concentration (mg/ml) | BSA concentration (mg/ml) | Positive Beads( $\mu$ l) | Positive SELEX Time |
|---------------------|----------------------------------|-----------------------------|---------------------------|--------------------------|---------------------|
| 1                   | 1400                             | 0.05                        | 0.05                      | 50                       | 1h                  |

|   |     |      |      |    |       |
|---|-----|------|------|----|-------|
| 2 | 100 | 0.05 | 0.05 | 50 | 1h    |
| 3 | 80  | 0.1  | 0.1  | 50 | 50min |
| 4 | 80  | 0.1  | 0.1  | 50 | 50min |
| 5 | 80  | 0.1  | 0.1  | 50 | 50min |
| 6 | 80  | 0.1  | 0.1  | 50 | 50min |
| 7 | 80  | 0.1  | 0.1  | 50 | 50min |

---

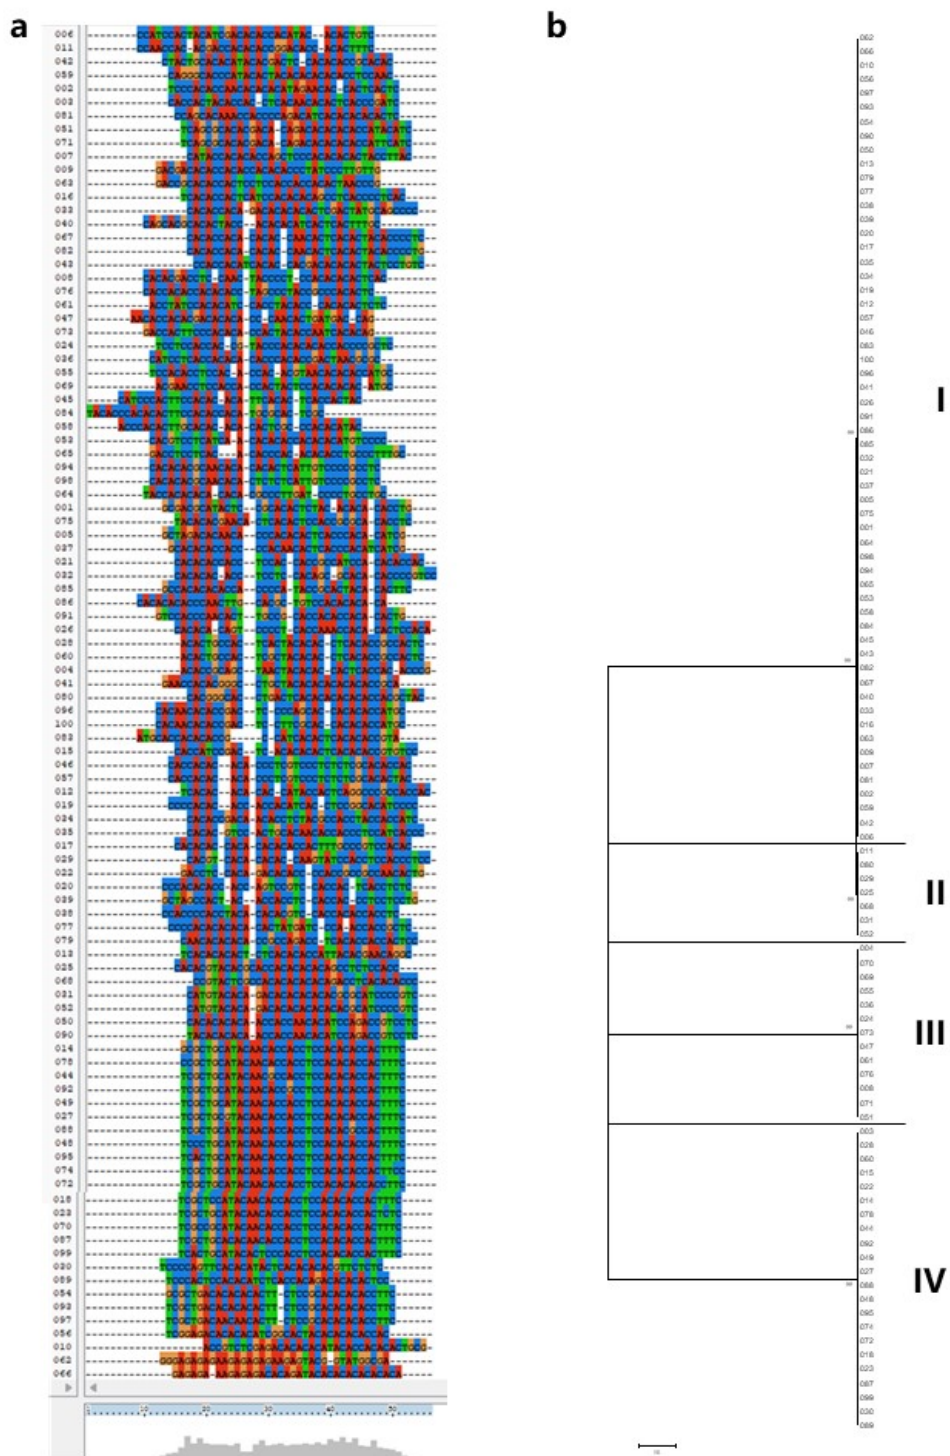

Figure S2. The group information of dominant sequences by MB-SELEX.

(a) The results of multiple sequence alignment. (b) The N-J tree of dominant sequences.

Table S3. Alternative aptamers from the MB-SELEX method

| Number  | Sequence(5' to 3')                                                                   | RU    | K <sub>D</sub> (M) | Family |
|---------|--------------------------------------------------------------------------------------|-------|--------------------|--------|
| β-Lg-01 | ATTGGCACTCCACGCATAGGGCGACGCATACTCC<br>GCACACTCTACACACACACCTGCCTATGCGTGCTA<br>CCGTGAA | 109.7 | 4.59E-09           | I      |
| β-Lg-02 | ATTGGCACTCCACGCATAGGTCCCACACCAACAC<br>ACACATAGAACACCACTCACTCCCTATGCGTGCTA<br>CCGTGAA | 96.9  | 4.33E-09           | I      |
| β-Lg-03 | ATTGGCACTCCACGCATAGGCACCACTACACCAC<br>CTCACAACACACTCACCCGATCCCTATGCGTGCTA<br>CCGTGAA | 91.8  | 3.89E-09           | IV     |
| β-Lg-04 | ATTGGCACTCCACGCATAGGACACCGCAGCTAAC<br>TACACACCACTCACACACCCGCCTATGCGTGCTA<br>CCGTGAA  | 79.3  | 5.13E-09           | III    |
| β-Lg-05 | ATTGGCACTCCACGCATAGGGCTAGACACAACAC<br>CCACACACTCACCCACACATCGCCTATGCGTGCTA<br>CCGTGAA | 74.5  | 5.49E-09           | I      |
| β-Lg-06 | ATTGGCACTCCACGCATAGGCCATCCACTACATCG<br>ACACACCACATACACTGTCCCTATGCGTGCTAC<br>CGTGAA   | 73.5  | 5.34E-09           | I      |
| β-Lg-07 | ATTGGCACTCCACGCATAGGCATAACCACACACCA<br>GCTCCCACACACTACCTTACCCTATGCGTGCTA<br>CCGTGAA  | 67.6  | 5.76E-09           | I      |
| β-Lg-08 | ATTGGCACTCCACGCATAGGCACACGACCTCAA<br>CTACCCCTCCACACACTCACCCCTATGCGTGCTA<br>CCGTGAA   | 64.8  | 5.30E-09           | III    |
| β-Lg-09 | ATTGGCACTCCACGCATAGGGACGACACACCACA<br>CCACACACCCTATCCCTTGTTCCTATGCGTGCTA<br>CCGTGAA  | 68.4  | 4.45E-09           | I      |
| β-Lg-10 | ATTGGCACTCCACGCATAGGACCGTCTCGAGACA<br>CACACATACACCACACACTGCGCCTATGCGTGCT<br>ACCGTGAA | 74.9  | 3.26E-09           | I      |
| β-Lg-11 | ATTGGCACTCCACGCATAGGCCAACCACACGACC<br>ACACACCCGGACACCACACTTTCCTATGCGTGCTA<br>CCGTGAA | 59.3  | 6.21E-09           | II     |
| β-Lg-12 | ATTGGCACTCCACGCATAGGTCACACACACACCA<br>TACCACTCAGGCCCGCCACCACCCTATGCGTGCTA<br>CCGTGAA | 62    | 5.86E-09           | I      |
| β-Lg-14 | ATTGGCACTCCACGCATAGGGCGCTGCATACAAC<br>ACCACCTCCACACACCACTTTCCTATGCGTGCTA<br>CCGTGAA  | 55.1  | 6.25E-09           | IV     |
| β-Lg-15 | ATTGGCACTCCACGCATAGGCACCATCCGACTCA<br>CACACACTCACACACCCGTGTCCCTATGCGTGCTA<br>CCGTGAA | 52.1  | 6.50E-09           | IV     |

Table S4. The response value of aptasensor to  $\beta$ -Lg at different time

|                | Day 1               | Day 7               | Day 15              |
|----------------|---------------------|---------------------|---------------------|
| $\beta$ -Lg-01 | 0.2231 $\pm$ 0.0005 | 0.2340 $\pm$ 0.0051 | 0.2180 $\pm$ 0.0011 |
